# Supplementary material for: Multi-omics analysis of early leaf development in Arabidopsis thaliana
Source: PubMed Central journal article supplement — Patterns (N Y). 2021 Apr 9;2(4):100235. doi: 10.1016/j.patter.2021.100235 (PMC8085607; doi:10.1016/j.patter.2021.100235), 2021-04-09
Supplement: mmc1.pdf [file mmc1.pdf]

**Patterns, Volume 2**

**Supplemental information**

**Multi-omics analysis of early  
leaf development in *Arabidopsis thaliana***

**Mohammad Amin Omidbakhshfard, Ewelina M. Sokolowska, Valerio Di Vittori, Leonardo Perez de Souza, Anastasiya Kuhalskaya, Yariv Brotman, Saleh Alseekh, Alisdair R. Fernie, and Aleksandra Skirycz**

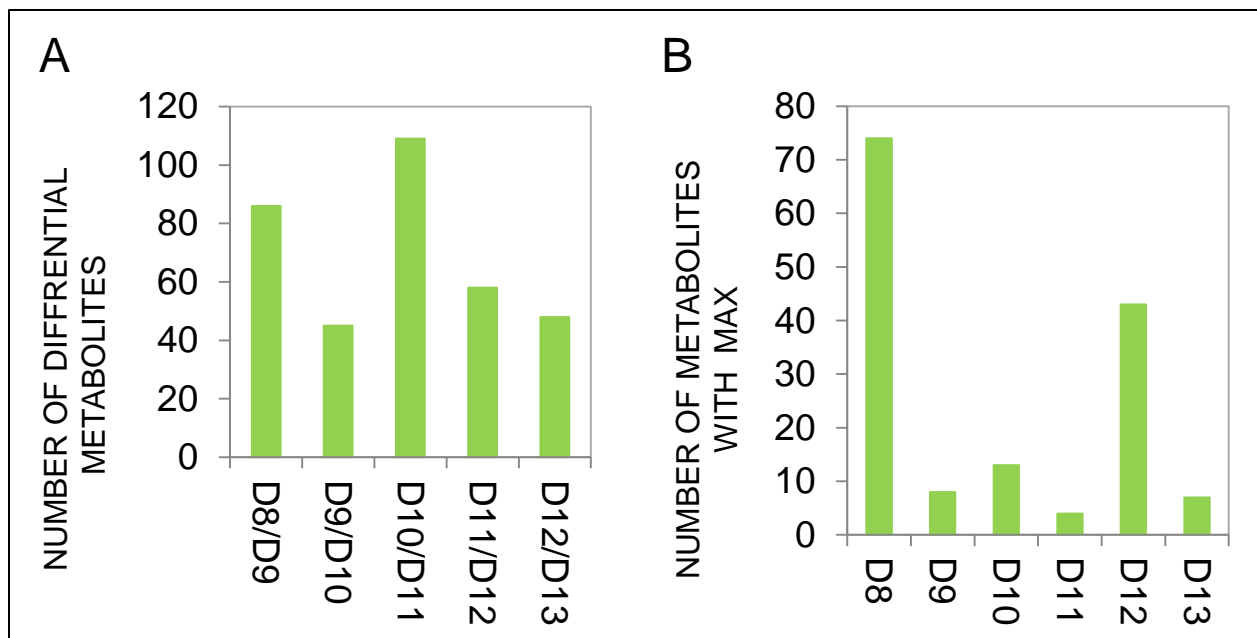

**Figure S1. Metabolite changes across early leaf development.** **(A)** Number of differential metabolites calculated between two consecutive time-points (e.g., between day 8 and day 9) using *t*-Test. **(B)** Number of metabolites with the highest abundance measured at a given day (axis x). **(A, B)** Analysis was restricted to the metabolites assigned as differential using one-way ANOVA. Complete data can be found in **Supplementary Dataset S3**.

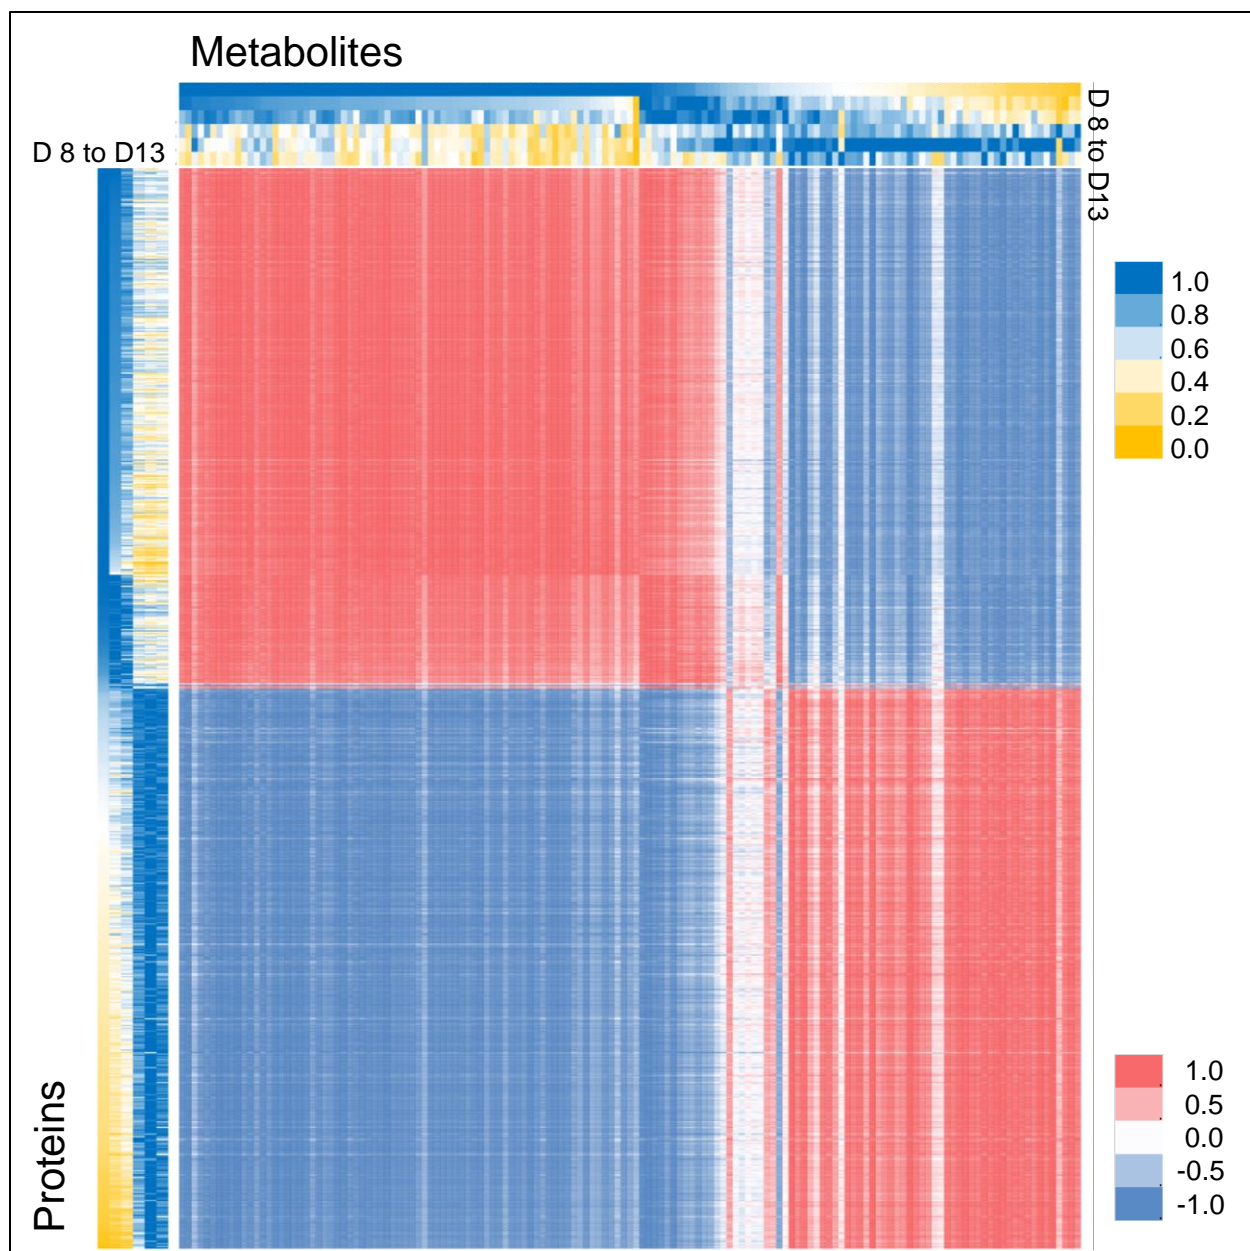

**Figure S2. Pearson correlation matrix between differential proteins and metabolites (red to blue).** Also given max normalized accumulation pattern across developmental series (blue to yellow). Complete data can be found in **Supplementary Dataset S4**.
